# Supplementary material for: Effectiveness of a Multicomponent Treatment for Fibromyalgia Based on Pain Neuroscience Education, Exercise Therapy, Psychological Support, and Nature Exposure (NAT-FM): A Pragmatic Randomized Controlled Trial
Source: PubMed Central journal article supplement (PMC7603188; doi:10.3390/jcm9103348), 2020-10-18
Supplement: jcm-09-03348-s001.pdf [file jcm-09-03348-s001.pdf]

**Table S1.** Correlation table between pre-6 week changes in process variables (TSK, PCS, PPCS and CERQ) and pre-post changes in main variables.

|                           | <b>FIQR</b> | <b>VAS-P</b> | <b>VAS-F</b> | <b>HADS-A</b> | <b>HADS-D</b> | <b>SF-36</b> | <b>SS</b> | <b>PANAS +</b> | <b>PANAS -</b> | <b>RSES</b> |
|---------------------------|-------------|--------------|--------------|---------------|---------------|--------------|-----------|----------------|----------------|-------------|
| TSK                       | 0.51 **     | 0.46 **      | 0.43 **      | 0.39 **       | -0.41 **      | -0.42 **     | 0.12      | -0.21 *        | 0.05           | 0.07        |
| PCS                       | 0.42 **     | 0.36 **      | 0.32 **      | 0.32 **       | 0.35 **       | -0.41 **     | 0.18      | -0.09          | 0.16           | 0.13        |
| PPCS                      | -0.46 **    | -0.36 **     | -0.14        | -0.51 **      | -0.49 **      | 0.43 **      | -0.10     | 0.14           | -0.22 *        | -0.15       |
| CERQ Acceptance           | -0.15       | -0.12        | 0.06         | -0.29 *       | -0.21 *       | 0.20 *       | 0.01      | 0.08           | 0.02           | -0.01       |
| CERQ Refocusing           | 0.34 **     | -0.20 *      | -0.02        | -0.35 **      | -0.37 **      | 0.33 **      | -0.18     | 0.08           | -0.08          | -0.00       |
| CERQ Planning             | -0.25 *     | -0.16        | -0.19        | -0.19         | -0.24 *       | 0.18         | 0.08      | 0.06           | -0.01          | -0.04       |
| CERQ Positive reappraisal | -0.36 **    | -0.29 *      | -0.28 *      | -0.38 **      | -0.37 **      | 0.37 **      | -0.08     | -0.30 *        | 0.07           | -0.23 *     |
| CERQ Catastrophizing      | 0.17        | 0.06         | 0.03         | 0.15          | 0.09          | -0.26 *      | 0.07      | 0.15           | 0.26 *         | -0.01       |

TSK, Tampa scale for kinesiophobia; PCS, pain catastrophizing scale; PPCS, personal perceived competence scale; CERQ, cognitive emotion regulation questionnaire; FIQR, fibromyalgia impact questionnaire; VAS-P, visual analog scale for pain; VAS-F, visual analog scale for fatigue; HADS, hospital anxiety and depression scale—depression; SF36, short form survey (physical functioning subscale); PANAS +, positive affect and negative affect schedule—positive affect; PANAS -, positive affect and negative affect schedule—negative affect; RSES, Rosenberg self-esteem scale. Note: only process variables which experienced a significant pretreatment to six weeks change were included. Process measures finally included in mediational models can be identified from the gray background. \* Means  $p < 0.05$ ; \*\* means  $p \leq 0.001$ .
